# Supplementary material for: Respiratory Viruses Dynamics and Interactions: Ten Years of Surveillance in Central Europe
Source: Research Square preprint supplement (doi:10.21203/rs.3.rs-957569/v1), 2021-10-14
Supplement: Supplementary file 1 [file ae5c43a824a15b34c05ba2c2.pdf]

**Table 1. Prevalence of Circulating Viruses**

| Prevalence of Circulating Viruses               |              |         |            |           |        |           |        |            |
|-------------------------------------------------|--------------|---------|------------|-----------|--------|-----------|--------|------------|
| Tests Used for Viral Infection Diagnostic       |              | Tested  |            | Negatives |        | Positives |        |            |
| tested virus                                    | Abbreviation | Number  | Proportion | Number    | Rate   | Number    | Rate   | Proportion |
| Influenza A (H3N2)                              | FLUA(H3N2)   | 93,848  | 6.66%      | 81,711    | 87.07% | 12,137    | 12.93% | 7.93%      |
| Influenza A (H1N1)                              | FLUA(H1N1)   | 65,468  | 4.65%      | 60,602    | 92.57% | 4,866     | 7.43%  | 3.18%      |
| Non-differentiated Influenza A (H1N1 and H3N2)  | FLUA-generic | 96,711  | 6.87%      | 64,907    | 67.11% | 31,804    | 32.89% | 20.79%     |
| Influenza B                                     | FLUB         | 168,628 | 11.97%     | 143,013   | 84.81% | 25,615    | 15.19% | 16.74%     |
| Parainfluenza 1                                 | HPIV-1       | 77,011  | 5.47%      | 75,848    | 98.49% | 1,163     | 1.51%  | 0.76%      |
| Parainfluenza 2                                 | HPIV-2       | 76,406  | 5.42%      | 75,431    | 98.72% | 975       | 1.28%  | 0.64%      |
| Parainfluenza 3                                 | HPIV-3       | 77,981  | 5.54%      | 73,380    | 94.10% | 4,601     | 5.90%  | 3.01%      |
| Parainfluenza 4                                 | HPIV-4       | 45,825  | 3.25%      | 44,978    | 98.15% | 847       | 1.85%  | 0.55%      |
| Non-differentiated Parainfluenza (1,2,3, and 4) | HPIV-generic | 21,949  | 1.56%      | 20,882    | 95.14% | 1,067     | 4.86%  | 0.70%      |

|                                                                |              |                  |             |                  |        |                |        |             |
|----------------------------------------------------------------|--------------|------------------|-------------|------------------|--------|----------------|--------|-------------|
| Metapneumovirus                                                | HMPV         | 86,107           | 6.11%       | 80,858           | 93.90% | 5,249          | 6.10%  | 3.43%       |
| Syncytial Respiratory Virus                                    | HRSV         | 97,976           | 6.96%       | 78,015           | 79.63% | 19,961         | 20.37% | 13.05%      |
| Rhinovirus                                                     | RV           | 74,061           | 5.26%       | 53,150           | 71.77% | 20,911         | 28.23% | 13.67%      |
| Enterovirus                                                    | EV           | 63,444           | 4.50%       | 59,377           | 93.59% | 4,067          | 6.41%  | 2.66%       |
| Non-differentiated Picornaviruses (Rhinovirus and Enterovirus) | RV/EV        | 8,604            | 0.61%       | 6,823            | 79.30% | 1,781          | 20.70% | 1.16%       |
| Adenovirus                                                     | HAdV         | 80,593           | 5.72%       | 73,611           | 91.34% | 6,982          | 8.66%  | 4.56%       |
| Coronavirus OC43                                               | HCoV-OC43    | 63,523           | 4.51%       | 60,818           | 95.74% | 2,705          | 4.26%  | 1.77%       |
| Coronavirus E229                                               | HCoV-E229    | 59,369           | 4.21%       | 58,132           | 97.92% | 1,237          | 2.08%  | 0.81%       |
| Coronavirus NL63                                               | HCoV-NL63    | 61,455           | 4.36%       | 59,922           | 97.51% | 1,533          | 2.49%  | 1.00%       |
| Coronavirus HKU1                                               | HCoV-HKU1    | 17,013           | 1.21%       | 16,812           | 98.82% | 201            | 1.18%  | 0.13%       |
| Non-differentiated Coronaviruses (OC43, E229, NL63 and HKU1)   | HCoV-generic | 7,628            | 0.54%       | 6,909            | 90.57% | 719            | 9.43%  | 0.47%       |
| Bocavirus                                                      | HBoV         | 65,057           | 4.62%       | 60,474           | 92.96% | 4,583          | 7.04%  | 3.00%       |
| <b>Total</b>                                                   |              | <b>1,408,657</b> | <b>100%</b> | <b>1,255,653</b> |        | <b>153,004</b> |        | <b>100%</b> |

**Table 1. Prevalence of Circulating Viruses.** The table describes the 21 tests to detect 17 respiratory viruses, indicating the name of the test performed, the abbreviation for this study. The table also shows the number of tests performed, tests with negatives outcome and tests with positive outcome of each specific test type. The proportion indicates the percentage of all tests in each category (tested and positives). The rate indicates the negativity and positivity rate of each test type.
